# Supplementary material for: Comprehensive Evaluation and Selection on Integrated Resistance to Major Diseases and Desirable Agronomic Traits of 38 Sugar Beet (Beta vulgaris L.) Germplasm in Northeast China
Source: Research Square preprint supplement (doi:10.21203/rs.3.rs-7541979/v1), 2025-09-26
Supplement: Supplementary file 1 [file 6eb03269fc8a2bf9d1afd0c9.xlsx]

## Sheet: Sheet1
Table 1S. The rainfall and high temperature data from January to December 2024 in Hulan District, Harbin City, Heilongjiang Province are provided by Harbin Meteorological Bureau.
Monthly	high temperature	low temperature	low temperature
January	-12℃	-24℃	1.9
February	-6℃	-18℃	0
March	3℃	-9℃	67.6
April	17℃	3℃	10.2
May	21℃	8℃	57.8
June	24℃	15℃	311.7
July	29℃	19℃	12.3
August	28℃	19℃	457.5
September	23℃	9℃	9.7
October	14℃	1℃	23.8
November	3℃	-8℃	1.9
December	-9℃	-19℃	0.5

## Sheet: Sheet2
Table 2S. Statistical table of 38 germplasm agronomic traits
	Number	Min	Max	Average	Standard deviation
Petiole thick	38	1	3	1.39	0.679
Petiole long	38	1	3	1.74	0.891
Shrub type	38	1	2	1.16	0.37
Blades	38	26	43	32.85	4.086
Stem lengt（cm）	38	59	74	67.78	3.427
Roots	38	1	2	1.82	0.393
Root size	38	1	2	1.26	0.446
Deep root groove	38	1	2	1.47	0.506
Smoothness root	38	1	2	1.16	0.37
Fleshy thick/thin	38	1	2	1.97	0.162

## Sheet: Sheet3
Table 3S. Statistical table of 38 germplasm agronomy and disease index traits
	Number	Min	Max	Average	Standard deviation	Variance	Skewness		Kurtosis
Tuber yield（kg/hm2）	38	34714	54233	46349.6	5067.74	2.5682e+07	-0.463	0.383	-0.189	0.75
Sugar production （kg/hm2）	38	5501	8645	7571.11	762.824	581900	-0.889	0.383	0.893	0.75
Root hammer （%）	38	20.39	22.78	21.5303	0.55018	0.303	-0.085	0.383	-0.394	0.75
Sugar content（%）	38	15	18	16.36	0.643	0.413	-0.133	0.383	-0.46	0.75
Potassium content (mmol/100g)	38	3.18	5.94	4.3371	0.51674	0.267	0.907	0.383	2.342	0.75
Sodium content (mmol/100g)	38	1.57	4.86	2.9608	0.85854	0.737	0.587	0.383	-0.442	0.75
α-N (mmol/100g)	38	4	9	6.51	1.113	1.24	0.163	0.383	-0.398	0.75
DISB	38	6	42	20.78	10.003	100.069	0.463	0.383	-0.902	0.75
BSDI	38	10	44	21.1	7.085	50.199	0.824	0.383	1.339	0.75
FHBI	38	2	53	29.52	14.902	222.055	-0.79	0.383	-0.409	0.75

## Sheet: Sheet4
Table 4.1S. Principal component analysis (PCA) loading matrix for agronomic and disease resistance traits.
	PCA1	PCA2	PCA3
Tuber.yield	-0.990239	0.139326	-0.00186101
Sugar.production	-0.139378	-0.989972	0.0144245
Root.hammer	4.10094e-05	-0.00153493	-0.00234607
Sugar.content	4.73903e-05	-0.002161	-0.000363586
Potassium.content	1.09665e-05	0.000422064	0.00424456
Sodium.content	-4.40023e-05	0.00103897	-0.00777208
α-N	6.26163e-05	0.00208794	0.01144
DISB	-0.000940697	0.00976647	-0.380257
BSDI	-0.000192345	0.00760955	0.0383624
FHBI	-0.000198852	0.0194175	0.923854
Matrix presents loadings of 8 traits (agronomic: Tuber.yield, Sugar.production, Root.hammer, Sugar.content, Potassium.content, Sodium.content, α-N; disease: DISB, BSDI, FHBI) on the first three principal components (PCA1–PCA3). PCA1 is dominated by Tuber. yield and Sugar.production, capturing agronomic yield variation. PCA2 refines yield structure via Sugar.production and Tuber.yield. PCA3 focuse…

## Sheet: Sheet5
Table 4.2S. PCA loading matrix illustrating trait contributions to the first eight principal components.
	Group	Sample	PCA1-37.09%	PCA2-28.25%	PCA3-14.18%	PCA4-8.53%	PCA5-5.88%	PCA6-4.75%	PCA7-1.31%	PCA8-0.01%
Tuber.yield	Tuber.yield	Tuber.yield	-0.508432	-0.124446	0.392196	-0.0168168	0.15492	0.166591	0.0999439	0.71426
Sugar.production	Sugar.production	Sugar.production	-0.403831	-0.314611	0.486748	-0.0682197	0.0884131	0.196991	-0.126819	-0.658527
Root.hammer	Root.hammer	Root.hammer	0.348696	-0.454209	-0.0451409	-0.143645	-0.147517	0.541086	0.578501	0.015327
Sugar.content	Sugar.content	Sugar.content	0.37139	-0.46268	0.14436	-0.093986	-0.217261	0.058513	-0.715583	0.235877
Potassium.content	Potassium.content	Potassium.content	0.0920325	0.420342	0.407689	-0.633515	-0.485302	-0.0653437	0.0862079	0.00841028
Sodium.content	Sodium.content	Sodium.content	-0.320561	0.00135929	-0.574525	-0.622427	0.188206	0.297942	-0.235657	-0.00447161
α-N	α-N	α-N	0.155878	0.535408	0.123313	0.27697	0.0931567	0.725296	-0.249518	-0.0114027
DISB	DISB	DISB	-0.428218	-0.0424691	-0.273652	0.316429	-0.787148	0.134721	-0.0445061	-0.00897245
The matrix displays loadings of 11 traits (agronomic: tuber yield, sugar production, root hammer, sugar content, potassium content, sodium content, α-N; disease: DISB) on PC1–PC8, with variance explained by each PC (37.09%–0.01%) labeled. PC1 (37.09%) is dominated by negative loadings from tuber yield (−0.508), sugar production (−0.404), and DISB (−0.428), capturing the yield-disease trade-off. P…
